# Supplementary material
Source: Springer Nature journal article supplement (https://www.springermedizin.de/resource/supplementary/13058_2011_2942_MOESM4_ESM.pdf/9702940)

**Cohort 1 (Dox / FUMI)****A**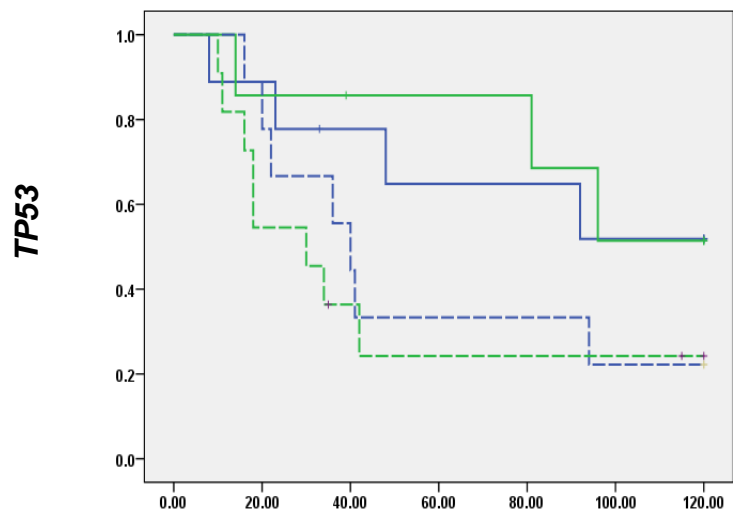**Cohort 2 (Epi)****B**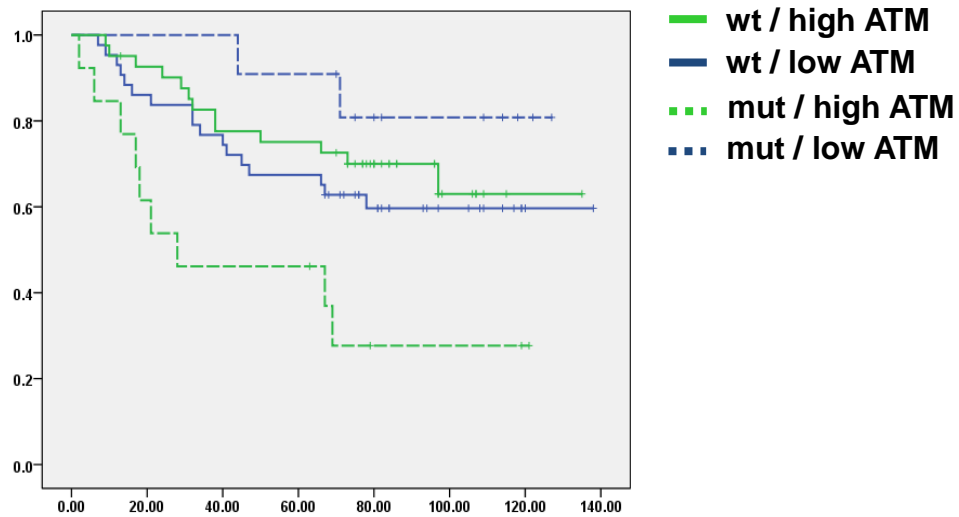**C**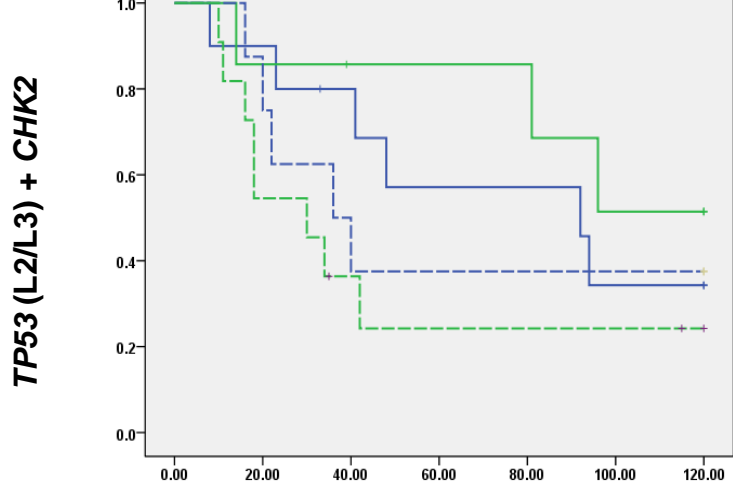**D**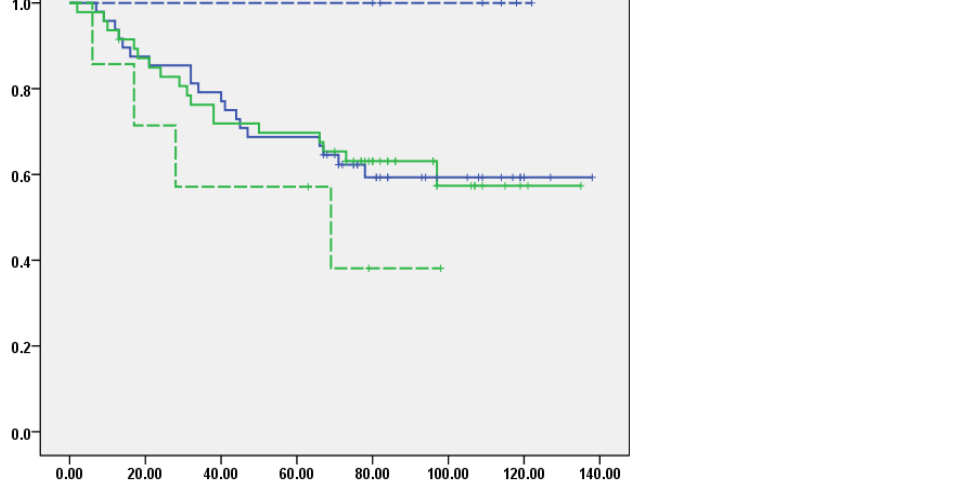

Supplement: MOESM4 [file 9702940]
